# Supplementary material
Source: HighWire-hosted journal article supplement (https://openheart.bmj.com/content/5/2/e000781)
Supplement: inline-supplementary-material-1 [file inline-supplementary-material-1.docx]

**Table S1. Multivariate predictors of in-hospital mortality (including year of percutaneous coronary intervention as variable).**

|  | OR | Lower 95% CI | Upper 95% CI | p Value |
| --- | --- | --- | --- | --- |
| Hospital volume |  |  |  |  |
| Lower-volume | referent | referent | referent |  |
| Higher-volume | 1.099 | 0.777 | 1.555 | 0.592 |
| Prior heart failure | 2.382 | 1.569 | 3.616 | <0.001 |
| Age | 1.063 | 1.045 | 1.082 | <0.001 |
| GFR | 0.990 | 0.986 | 0.993 | <0.001 |
| Heart failure at admission | 3.017 | 2.122 | 4.288 | <0.001 |
| Chronic lung disease | 0.741 | 0.314 | 1.744 | 0.492 |
| STEMI | 6.235 | 4.468 | 8.700 | <0.001 |
| Peripheral vascular disease | 1.322 | 0.814 | 2.149 | 0.259 |
| Year of PCI |  |  |  |  |
| 2010 | referent | referent | referent |  |
| 2011 | 0.885 | 0.548 | 1.431 | 0.619 |
| 2012 | 0.753 | 0.463 | 1.226 | 0.254 |
| 2013 | 0.576 | 0.334 | 0.993 | 0.047 |
| 2014 | 1.244 | 0.727 | 2.129 | 0.426 |
| 2015 | 0.880 | 0.301 | 2.575 | 0.815 |
| *OR*  odds ratio, *CI*  confidence interval, *GFR* glomerular filtration rate, *STEMI*  ST-elevation myocardial infarction, *PCI* percutaneous coronary intervention. | | | | |
