# Supplementary material
Source: HighWire-hosted journal article supplement (https://openheart.bmj.com/content/5/2/e000781)
Supplement: inline-supplementary-material-2 [file inline-supplementary-material-2.docx]

**Table S2. Multivariate predictors of in-hospital general complications (including year of percutaneous coronary intervention as variable).**

|  | OR | Lower 95% CI | Upper 95% CI | p Value |
| --- | --- | --- | --- | --- |
| Hospital volume |  |  |  |  |
| Lower-volume | referent | referent | referent |  |
| Higher-volume | 1.407 | 0.878 | 2.257 | 0.156 |
| Prior heart failure | 1.363 | 1.104 | 1.683 | 0.004 |
| Age | 1.021 | 1.015 | 1.027 | <0.001 |
| GFR | 0.989 | 0.986 | 0.992 | <0.001 |
| Heart failure at admission | 1.653 | 1.388 | 1.968 | <0.001 |
| Chronic lung disease | 1.019 | 0.718 | 1.446 | 0.917 |
| STEMI | 2.535 | 2.203 | 2.917 | <0.001 |
| Peripheral vascular disease | 1.055 | 0.846 | 1.315 | 0.634 |
| Year of PCI |  |  |  |  |
| 2010 | referent | referent | referent |  |
| 2011 | 0.711 | 0.590 | 0.858 | <0.001 |
| 2012 | 0.599 | 0.495 | 0.725 | <0.001 |
| 2013 | 0.567 | 0.464 | 0.692 | <0.001 |
| 2014 | 0.434 | 0.339 | 0.555 | <0.001 |
| 2015 | 0.476 | 0.306 | 0.740 | 0.001 |
| *OR*  odds ratio, *CI*  confidence interval, *GFR* glomerular filtration rate, *STEMI*  ST-elevation myocardial infarction. | | | | |
