# Supplementary material
Source: HighWire-hosted journal article supplement (https://openheart.bmj.com/content/5/2/e000781)
Supplement: inline-supplementary-material-3 [file inline-supplementary-material-3.docx]

**Table S3. Multivariate predictors of in-hospital mortality (using continuous hospital volume).**

|  | OR | Lower 95% CI | Upper 95% CI | p Value |
| --- | --- | --- | --- | --- |
| Hospital volume (continuous volume) | 1.000 | 0.998 | 1.001 | 0.713 |
| Prior heart failure | 1.224 | 0.982 | 1.526 | 0.072 |
| Age | 1.010 | 1.004 | 1.016 | 0.002 |
| GFR | 0.995 | 0.992 | 0.997 | <0.001 |
| Heart failure at admission | 1.519 | 1.254 | 1.840 | <0.001 |
| Chronic lung disease | 0.935 | 0.643 | 1.359 | 0.724 |
| STEMI | 1.615 | 1.388 | 1.880 | <0.001 |
| Peripheral vascular disease | 1.029 | 0.819 | 1.293 | 0.806 |
| *OR*  odds ratio, *CI*  confidence interval, *GFR* glomerular filtration rate, *STEMI*  ST-elevation myocardial infarction. | | | | |
