# Supplementary material
Source: HighWire-hosted journal article supplement (https://openheart.bmj.com/content/5/2/e000781)
Supplement: inline-supplementary-material-4 [file inline-supplementary-material-4.docx]

**Table S4. Multivariate predictors of in-hospital general complications (using continuous hospital volume).**

|  | OR | Lower 95% CI | Upper 95% CI | p Value |
| --- | --- | --- | --- | --- |
| Hospital volume (continuous volume) | 1.001 | 0.999 | 1.003 | 0.186 |
| Prior heart failure | 1.338 | 1.150 | 1.557 | <0.001 |
| Age | 1.020 | 1.015 | 1.025 | <0.001 |
| GFR | 0.987 | 0.985 | 0.989 | <0.001 |
| Heart failure at admission | 1.661 | 1.455 | 1.896 | <0.001 |
| Chronic lung disease | 1.040 | 0.811 | 1.333 | 0.760 |
| STEMI | 2.704 | 2.441 | 2.997 | <0.001 |
| Peripheral vascular disease | 1.058 | 0.904 | 1.239 | 0.479 |
| Year of PCI |  |  |  |  |
| 2010 | referent | referent | referent |  |
| 2011 |  |  |  |  |
| 2012 |  |  |  |  |
| 2013 |  |  |  |  |
| 2014 |  |  |  |  |
| 2015 |  |  |  |  |
| *OR*  odds ratio, *CI*  confidence interval, *GFR* glomerular filtration rate, *STEMI*  ST-elevation myocardial infarction. | | | | |
